# Supplementary material for: Impact of nitrogen fertilizer type and application rate on growth, nitrate accumulation, and postharvest quality of spinach
Source: PeerJ. 2024 Jul 12;12:e17726. doi: 10.7717/peerj.17726 (PMC11249000; doi:10.7717/peerj.17726)
Supplement: Supplemental Information 1 [file peerj-12-17726-s001.xlsx]

## Sheet: All Data Ecept Nitrate
Day	Fertilizer Type	Nitrogen Dose mg/kg	Fresh Weight	Number of Leaves	Leaf Length (cm)	Leaf Width (cm)	Fresh Weight- O D g	Fresh Weight- 5 D g	Fresh Weight- 10 D g	Green Part Length cm	SPAD
0	AS	25	5.37	34	6.5	3.2	5.37	5.58	3.05	14.5	36.6
0	AS	25	11.18	35	7.2	3.5	11.18	10.82	2.18	14.5	38.1
0	AS	25	7.9	36	7.5	3.5	7.9	7.04	9.18	14	37.1
0	AS	50	7.79	43	7	3.9	7.79	6.08	4.79	16.6	25.9
0	AS	50	11.29	45	7.5	3.9	11.29	6.72	4.5	17.6	26.9
0	AS	50	12.29	44	8	4.3	12.29	13.4	7.5	17.3	25.1
0	AS	100	8.35	40	8.5	3.5	8.35	9.8	7.23	17.4	32
0	AS	100	12	42	9.5	3.8	12	18.06	13.01	17.5	33.1
0	AS	100	12.48	41	8	3.5	12.48	7.76	4.94	17	33.5
0	AS	200	16.32	50	8	4	16.32	14.26	6.66	20	57.1
0	AS	200	13.4	50	9	4	13.4	16.7	13.22	21.5	55.1
0	AS	200	16.3	50	7.5	4	16.3	13.78	10.31	21	53.8
0	AS	400	9.5	44	8.5	3.5	9.5	12.41	8.28	17.9	57.9
0	AS	400	12.25	44	6.8	3.5	12.25	11.04	5.68	18	59.1
0	AS	400	12.7	45	8	3.7	12.7	15.88	11.6	18.5	57.2
0	SRAS	25	6.37	37	6.5	3	6.37	7.6	4.68	14	33.2
0	SRAS	25	4.66	39	6	3	4.66	4.5	5.77	14.2	31.6
0	SRAS	25	5.71	38	6	3.2	5.71	5.53	1.85	14.3	32.6
0	SRAS	50	8.82	48	7.5	3.5	8.82	8.26	7.25	14.2	4.06
0	SRAS	50	8.84	47	7.8	3.8	8.84	9.56	8.26	14.5	38.2
0	SRAS	50	6.61	46	6.5	3	6.61	7.13	4.23	14	39.3
0	SRAS	100	9.32	53	7.5	3.3	9.32	14.72	5.57	17.5	42.2
0	SRAS	100	10.05	54	7.5	3.5	10.05	7.07	6.08	17	44.2
0	SRAS	100	9.37	52	7.5	3	9.37	14.66	3.82	17	43.2
0	SRAS	200	16.5	54	7.5	3.9	16.5	13	8.89	18	56.2
0	SRAS	200	17.6	54	8	4.2	17.6	11.5	13.55	17.5	57.3
0	SRAS	200	10.15	54	7	4	10.15	9.23	10.13	17	56.4
0	SRAS	400	15.24	59	8	4.5	15.24	13.7	15.49	20	51
0	SRAS	400	14.92	59	8	4.3	14.92	14.53	14.51	20.5	52.3
0	SRAS	400	13	58	9	4.5	13	13.39	14.05	21	51.3
0	CN	25	5.92	34	7	3.3	5.92	8.93	5.64	15	41.1
0	CN	25	10.29	33	8	3.5	10.29	7.17	5.7	16	42.6
0	CN	25	7.77	35	7	3.5	7.77	5.95	7.56	15	42.5
0	CN	50	8.45	42	6.5	3.2	8.45	8.28	6.81	15.2	34.4
0	CN	50	10.83	42	6.5	3.5	10.83	9.46	5.25	15	34.6
0	CN	50	8.35	42	8	3.7	8.35	8.84	13	16	33.5
0	CN	100	10.85	36	9	4	10.85	9.24	9.14	19.5	36.5
0	CN	100	16.87	37	8.5	4.5	16.87	13.33	7.05	19	37.5
0	CN	100	10.95	38	8	4.1	10.95	13.85	13.38	19.5	36.8
0	CN	200	11.85	51	9.5	4.4	11.85	12.6	12.61	20	54.3
0	CN	200	17.36	51	9	4.1	17.36	8.86	16.42	20.3	53
0	CN	200	19.36	51	8.5	4	19.36	8.38	14.24	20.8	51.2
0	CN	400	11.79	45	8	4.3	11.79	10.51	11.4	19.9	68
0	CN	400	10.49	45	9	4.1	10.49	13.05	12.02	19.9	63.9
0	CN	400	13.22	46	10	4	13.22	22.16	20.6	21.5	54.2
0	YR	25	4.84	32	6	3	4.84	4.7	4.12	14	34.7
0	YR	25	8.27	32	5.5	3.3	8.27	4.19	5.1	14	33.5
0	YR	25	7.97	32	5.5	3	7.97	5.29	2.96	13	36.2
0	YR	50	7.67	37	6.5	3.7	7.67	6.05	5.43	13.5	39.5
0	YR	50	8.32	37	8	3.9	8.32	6.66	7.62	14.5	36.7
0	YR	50	7.31	37	7	3.8	7.31	9.1	5.54	14	39.9
0	YR	100	10.1	53	7	4	10.1	7.88	7.1	16.5	43
0	YR	100	9.23	52	7.7	4.5	9.23	8.02	8.31	17	41.6
0	YR	100	16.7	51	8	4	16.7	11.1	8.6	18	41
0	YR	200	11.86	39	8	4.5	11.86	11.59	5.27	18.5	51.3
0	YR	200	14.08	40	7	4.2	14.08	10.73	10.77	18	49.5
0	YR	200	13.85	41	6.5	4	13.85	10.23	6.77	16.5	50.4
0	YR	400	16.2	48	10	5.5	16.2	12.83	13.78	23	50.8
0	YR	400	17.54	50	11	5	17.54	16.85	17.14	24	48.9
0	YR	400	16.12	49	10	5.4	16.12	13.1	19.68	24	50.7
5	AS	25	5.58
5	AS	25	10.82
5	AS	25	7.04
5	AS	50	6.08
5	AS	50	6.72
5	AS	50	13.4
5	AS	100	9.8
5	AS	100	18.06
5	AS	100	7.76
5	AS	200	14.26
5	AS	200	16.7
5	AS	200	13.78
5	AS	400	12.41
5	AS	400	11.04
5	AS	400	15.88
5	SRAS	25	7.6
5	SRAS	25	4.5
5	SRAS	25	5.53
5	SRAS	50	8.26
5	SRAS	50	9.56
5	SRAS	50	7.13
5	SRAS	100	14.72
5	SRAS	100	7.07
5	SRAS	100	14.66
5	SRAS	200	13
5	SRAS	200	11.5
5	SRAS	200	9.23
5	SRAS	400	13.7
5	SRAS	400	14.53
5	SRAS	400	13.39
5	CN	25	8.93
5	CN	25	7.17
5	CN	25	5.95
5	CN	50	8.28
5	CN	50	9.46
5	CN	50	8.84
5	CN	100	9.24
5	CN	100	13.33
5	CN	100	13.85
5	CN	200	12.6
5	CN	200	8.86
5	CN	200	8.38
5	CN	400	10.51
5	CN	400	13.05
5	CN	400	22.16
5	YR	25	4.7
5	YR	25	4.19
5	YR	25	5.29
5	YR	50	6.05
5	YR	50	6.66
5	YR	50	9.1
5	YR	100	7.88
5	YR	100	8.02
5	YR	100	11.1
5	YR	200	11.59
5	YR	200	10.73
5	YR	200	10.23
5	YR	400	12.83
5	YR	400	16.85
5	YR	400	13.1
10	AS	25	3.05
10	AS	25	2.18
10	AS	25	9.18
10	AS	50	4.79
10	AS	50	4.5
10	AS	50	7.5
10	AS	100	7.23
10	AS	100	13.01
10	AS	100	4.94
10	AS	200	6.66
10	AS	200	13.22
10	AS	200	10.31
10	AS	400	8.28
10	AS	400	5.68
10	AS	400	11.6
10	SRAS	25	4.68
10	SRAS	25	5.77
10	SRAS	25	1.85
10	SRAS	50	7.25
10	SRAS	50	8.26
10	SRAS	50	4.23
10	SRAS	100	5.57
10	SRAS	100	6.08
10	SRAS	100	3.82
10	SRAS	200	8.89
10	SRAS	200	13.55
10	SRAS	200	10.13
10	SRAS	400	15.49
10	SRAS	400	14.51
10	SRAS	400	14.05
10	CN	25	5.64
10	CN	25	5.7
10	CN	25	7.56
10	CN	50	6.81
10	CN	50	5.25
10	CN	50	13
10	CN	100	9.14
10	CN	100	7.05
10	CN	100	13.38
10	CN	200	12.61
10	CN	200	16.42
10	CN	200	14.24
10	CN	400	11.4
10	CN	400	12.02
10	CN	400	20.6
10	YR	25	4.12
10	YR	25	5.1
10	YR	25	2.96
10	YR	50	5.43
10	YR	50	7.62
10	YR	50	5.54
10	YR	100	7.1
10	YR	100	8.31
10	YR	100	8.6
10	YR	200	5.27
10	YR	200	10.77
10	YR	200	6.77
10	YR	400	13.78
10	YR	400	17.14
10	YR	400	19.68

## Sheet: ANOVA_HID
	Category	LS mean	Standard error
	25	36.6875	0.573844
	50	42.5	0.811538
	100	45.75	0.662618
	200	48.75	0.662618
	400	49.3333	0.662618
	N Doses (mg/kg)\Fertilizer Type	1	2	3	4
	25	37	40.5	36	33.25
	50	44.5	46.5	42	37
	100	41	53	37	52
	200	50	54	51	40
	400	44.3333	58.6667	45.3333	49
	Category	LS mean	Standard error
	1	43.3667	0.607299
	2	50.5333	0.607299
	3	42.2667	0.607299
	4	42.25	0.607299
	Fertilizer Type\N Doses (mg/kg)	25	50	100	200	400
	1	37	44.5	41	50	44.3333
	2	40.5	46.5	53	54	58.6667
	3	36	42	37	51	45.3333
	4	33.25	37	52	40	49

## Sheet: ANOVA_HID1
	Category	LS mean	Standard error
	25	6.6375	0.162436
	50	7.4125	0.229719
	100	8.05833	0.187565
	200	7.95833	0.187565
	400	8.85833	0.187565
	N Doses (mg/kg)\Fertilizer Type	1	2	3	4
	25	7.05	6.5	7.125	5.875
	50	7.75	7.15	7.25	7.5
	100	8.66667	7.5	8.5	7.56667
	200	8.16667	7.5	9	7.16667
	400	7.76667	8.33333	9	10.3333
	Category	LS mean	Standard error
	1	7.88	0.171906
	2	7.39667	0.171906
	3	8.175	0.171906
	4	7.68833	0.171906
	Fertilizer Type\N Doses (mg/kg)	25	50	100	200	400
	1	7.05	7.75	8.66667	8.16667	7.76667
	2	6.5	7.15	7.5	7.5	8.33333
	3	7.125	7.25	8.5	9	9
	4	5.875	7.5	7.56667	7.16667	10.3333

## Sheet: ANOVA_HID2
	Category	LS mean	Standard error
	25	3.33125	0.0590396
	50	3.7375	0.0834946
	100	3.80833	0.0681731
	200	4.10833	0.0681731
	400	4.35833	0.0681731
	N Doses (mg/kg)\Fertilizer Type	1	2	3	4
	25	3.525	3.175	3.375	3.25
	50	4.1	3.4	3.6	3.85
	100	3.6	3.26667	4.2	4.16667
	200	4	4.03333	4.16667	4.23333
	400	3.56667	4.43333	4.13333	5.3
	Category	LS mean	Standard error
	1	3.75833	0.0624817
	2	3.66167	0.0624817
	3	3.895	0.0624817
	4	4.16	0.0624817
	Fertilizer Type\N Doses (mg/kg)	25	50	100	200	400
	1	3.525	4.1	3.6	4	3.56667
	2	3.175	3.4	3.26667	4.03333	4.43333
	3	3.375	3.6	4.2	4.16667	4.13333
	4	3.25	3.85	4.16667	4.23333	5.3

## Sheet: ANOVA_HID3
	Category	LS mean	Standard error
	25	22.3587	0.779572
	50	27.4825	1.10248
	100	33.3675	0.900172
	200	41.6925	0.900172
	400	45.4775	0.900172
	N Doses (mg/kg)\Fertilizer Type	1	2	3	4
	25	24.4475	20.225	25.6525	19.11
	50	29.27	26.325	30.015	24.32
	100	34.9167	27.17	39.01	32.3733
	200	45.2233	42.9033	43.89	34.7533
	400	37.7333	46.87	45.31	51.9967
	Category	LS mean	Standard error
	1	34.3182	0.825021
	2	32.6987	0.825021
	3	36.7755	0.825021
	4	32.5107	0.825021
	Fertilizer Type\N Doses (mg/kg)	25	50	100	200	400
	1	24.4475	29.27	34.9167	45.2233	37.7333
	2	20.225	26.325	27.17	42.9033	46.87
	3	25.6525	30.015	39.01	43.89	45.31
	4	19.11	24.32	32.3733	34.7533	51.9967

## Sheet: ANOVA_HID4
	Category	LS mean	Standard error
	25	7.43625	0.563397
	50	9.23	0.796764
	100	11.3558	0.650555
	200	14.8858	0.650555
	400	13.5808	0.650555
	N Doses (mg/kg)\Fertilizer Type	1	2	3	4
	25	8.06	6.39	8.1075	7.1875
	50	11.79	7.725	9.59	7.815
	100	10.9433	9.58	12.89	12.01
	200	15.34	14.75	16.19	13.2633
	400	11.4833	14.3867	11.8333	16.62
	Category	LS mean	Standard error
	1	11.5233	0.596243
	2	10.5663	0.596243
	3	11.7222	0.596243
	4	11.3792	0.596243
	Fertilizer Type\N Doses (mg/kg)	25	50	100	200	400
	1	8.06	11.79	10.9433	15.34	11.4833
	2	6.39	7.725	9.58	14.75	14.3867
	3	8.1075	9.59	12.89	16.19	11.8333
	4	7.1875	7.815	12.01	13.2633	16.62

## Sheet: ANOVA_HID5
	Category	LS mean	Standard error
	25	1.3075	0.108688
	50	1.4725	0.153707
	100	1.73917	0.125502
	200	1.945	0.125502
	400	1.85583	0.125502
	N Doses (mg/kg)\Fertilizer Type	1	2	3	4
	25	1.3325	1.4675	1.33	1.1
	50	1.645	1.4	1.515	1.33
	100	1.46	1.68	2.03333	1.78333
	200	1.97667	2.17	1.83333	1.8
	400	1.62	2.06333	1.67333	2.06667
	Category	LS mean	Standard error
	1	1.60683	0.115024
	2	1.75617	0.115024
	3	1.677	0.115024
	4	1.616	0.115024
	Fertilizer Type\N Doses (mg/kg)	25	50	100	200	400
	1	1.3325	1.645	1.46	1.97667	1.62
	2	1.4675	1.4	1.68	2.17	2.06333
	3	1.33	1.515	2.03333	1.83333	1.67333
	4	1.1	1.33	1.78333	1.8	2.06667

## Sheet: ANOVA_HID6
	Category	LS mean	Standard error
	25	6.62312	0.686045
	50	8.85875	0.970214
	100	11.2908	0.792177
	200	11.7383	0.792177
	400	14.1208	0.792177
	N Doses (mg/kg)\Fertilizer Type	1	2	3	4
	25	7.38	6.4725	7.5825	5.0575
	50	10.06	8.345	9.15	7.88
	100	11.8733	12.15	12.14	9
	200	14.9133	11.2433	9.94667	10.85
	400	13.11	13.8733	15.24	14.26
	Category	LS mean	Standard error
	1	11.4673	0.726042
	2	10.4168	0.726042
	3	10.8118	0.726042
	4	9.4095	0.726042
	Fertilizer Type\N Doses (mg/kg)	25	50	100	200	400
	1	7.38	10.06	11.8733	14.9133	13.11
	2	6.4725	8.345	12.15	11.2433	13.8733
	3	7.5825	9.15	12.14	9.94667	15.24
	4	5.0575	7.88	9	10.85	14.26

## Sheet: ANOVA_HID7
	Category	LS mean	Standard error
	25	1.18437	0.10301
	50	1.5875	0.145678
	100	1.905	0.118946
	200	1.72333	0.118946
	400	2.04	0.118946
	N Doses (mg/kg)\Fertilizer Type	1	2	3	4
	25	1.33	1.2175	1.3	0.89
	50	1.775	1.505	1.7	1.37
	100	1.83333	2.27667	2.02333	1.48667
	200	2.02667	1.90333	1.50667	1.45667
	400	1.98667	2.12667	2.26	1.78667
	Category	LS mean	Standard error
	1	1.79033	0.109016
	2	1.80583	0.109016
	3	1.758	0.109016
	4	1.398	0.109016
	Fertilizer Type\N Doses (mg/kg)	25	50	100	200	400
	1	1.33	1.775	1.83333	2.02667	1.98667
	2	1.2175	1.505	2.27667	1.90333	2.12667
	3	1.3	1.7	2.02333	1.50667	2.26
	4	0.89	1.37	1.48667	1.45667	1.78667

## Sheet: ANOVA_HID8
	Category	LS mean	Standard error
	25	5.12937	0.685944
	50	6.9875	0.970072
	100	7.8525	0.79206
	200	10.7367	0.79206
	400	13.6858	0.79206
	N Doses (mg/kg)\Fertilizer Type	1	2	3	4
	25	4.8	4.8875	6.4275	4.4025
	50	6	6.245	9.125	6.58
	100	8.39333	5.15667	9.85667	8.00333
	200	10.0633	10.8567	14.4233	7.60333
	400	8.52	14.6833	14.6733	16.8667
	Category	LS mean	Standard error
	1	7.55533	0.725935
	2	8.36583	0.725935
	3	10.9012	0.725935
	4	8.69117	0.725935
	Fertilizer Type\N Doses (mg/kg)	25	50	100	200	400
	1	4.8	6	8.39333	10.0633	8.52
	2	4.8875	6.245	5.15667	10.8567	14.6833
	3	6.4275	9.125	9.85667	14.4233	14.6733
	4	4.4025	6.58	8.00333	7.60333	16.8667

[truncated: 53 more sheets: ANOVA_HID9, ANOVA_HID10, ANOVA_HID11, ANOVA_HID12, ANOVA_HID13, ANOVA_HID14, ANOVA_HID15, ANOVA_HID16, ANOVA_HID17, ANOVA_HID18, ANOVA_HID19, ANOVA_HID20, ANOVA_HID21, ANOVA_HID22, ANOVA1_HID, ANOVA1_HID1, ANOVA1_HID2, ANOVA1_HID3, ANOVA1_HID4, ANOVA1_HID5 …]
